# Supplementary material for: Synthesis of high molar mass all-(meth)acrylic thermoplastic elastomers by photo-iniferter RAFT polymerisation
Source: Royal Society of Chemistry journal article supplement (doi:10.1039/d4py01123f), 2024-01-01
Supplement: d4py01123f1.pdf [file d4py01123f1.pdf]

# **Synthesis of high molar mass all-(meth)acrylic thermoplastic elastomers by photo-initiated RAFT polymerisation**

Izabela Kurowska,<sup>a</sup> Maksym Odnoroh,<sup>b</sup> Oleksandr Ivanchenko,<sup>b</sup> Marc Guerre,<sup>b</sup>  
Mathias Destarac<sup>\*b</sup>

<sup>a</sup> Faculty of Chemistry, University of Białystok, Ciołkowskiego 1k, 15-245 Białystok, Poland

<sup>b</sup> Laboratoire SOFTMAT, CNRS UMR 5623, Université de Toulouse, Université Toulouse III-Paul Sabatier, 118 route de Narbonne, F-31062 Toulouse, France

E-mail: [mathias.destarac@univ-tlse3.fr](mailto:mathias.destarac@univ-tlse3.fr)

|                                                                                                                                                                                                                                                                                                                                                           |    |
|-----------------------------------------------------------------------------------------------------------------------------------------------------------------------------------------------------------------------------------------------------------------------------------------------------------------------------------------------------------|----|
| Table of Contents                                                                                                                                                                                                                                                                                                                                         |    |
| <b>Methods</b> .....                                                                                                                                                                                                                                                                                                                                      | 3  |
| <b>Synthetic protocols</b> .....                                                                                                                                                                                                                                                                                                                          | 4  |
| <b>Figure S1.</b> UV-Vis spectrum of bis-(2-methylpropanenitrile)trithiocarbonate ( <b>TTC-bCP</b> ).....                                                                                                                                                                                                                                                 | 5  |
| <b>Figure S2.</b> Blue (A) and green (B) LED light photoreactors (view from the top). .....                                                                                                                                                                                                                                                               | 5  |
| <b>Table S1.</b> Detailed information about the photoreactors.....                                                                                                                                                                                                                                                                                        | 5  |
| <b>Figure S3.</b> SEC chromatograms of PMMA ( $M_{n,th} = 50 \text{ kg mol}^{-1}$ ) obtained with different sources of visible light: a) normalized RI signal, b) UV detector (290 nm) voltage versus time. Blue SEC traces represent PMMA prepared under blue LED irradiation. Green SEC traces represent PMMA prepared under green LED irradiation..... | 6  |
| <b>Figure S4.</b> Evolution of PMMA SEC-RI chromatograms with MMA conversion for polymerisations carried out with a) $[MMA]_0 = 4.28 \text{ mol L}^{-1}$ in acetonitrile and b) $[MMA]_0 = 6.21 \text{ mol L}^{-1}$ in acetonitrile. Reaction conditions given in Table S2. ....                                                                          | 6  |
| <b>Figure S5.</b> Evolution of SEC-RI chromatograms of PMMA prepared with TTC-bCP with MMA conversion for different targeted molar masses corresponding to $[TTC-bCP]_0 = 12.49, 3.11, 1.55 \text{ mmol L}^{-1}$ respectively. Reaction conditions given in Table S3. ....                                                                                | 7  |
| <b>Figure S6.</b> SEC chromatograms of PMMA ( $M_{n,SEC} = 192 \text{ kg mol}^{-1}$ , $\bar{D} = 1.24$ ) prepared by bulk polymerisation. ....                                                                                                                                                                                                            | 7  |
| <b>Figure S7.</b> Evolution of SEC-RI chromatograms of PnBA with nBA conversion for different molar masses. Reaction conditions given in Table S4. ....                                                                                                                                                                                                   | 8  |
| <b>Figure S8.</b> Evolution of $M_n$ and $\bar{D}$ during PI-RAFT polymerisation of PMMA- <i>b</i> -PnBA- <i>b</i> -PMMA from PMMA <sub>154k</sub> . Reaction conditions given in Table S5. ....                                                                                                                                                          | 8  |
| <b>Figure S9.</b> Evolution of SEC-RI chromatograms of PMMA- <i>b</i> -PnBA- <i>b</i> -PMMA synthesis from PMMA macro-CTA with nBA conversion for different molar masses. Reaction conditions given in Table S5.....                                                                                                                                      | 9  |
| <b>Figure S10.</b> DSC thermogram of PMMA <sub>77k</sub> - <i>b</i> -PnBA <sub>531k</sub> - <i>b</i> -PMMA <sub>77k</sub> . ....                                                                                                                                                                                                                          | 9  |
| <b>Figure S11.</b> TGA of PMMA <sub>77k</sub> - <i>b</i> -PnBA <sub>531k</sub> - <i>b</i> -PMMA <sub>77k</sub> in air and N <sub>2</sub> atmosphere. ....                                                                                                                                                                                                 | 10 |
| <b>Table S2.</b> PI-RAFT polymerisation of MMA with <b>TTC-bCP</b> at ambient temperature with different MMA concentrations. ....                                                                                                                                                                                                                         | 10 |
| <b>Table S3.</b> PI-RAFT polymerisation of MMA with <b>TTC-bCP</b> at ambient temperature with 30 LEDs. ....                                                                                                                                                                                                                                              | 10 |
| <b>Table S4.</b> PI-RAFT polymerisation of nBA with <b>TTC-bCP</b> at ambient temperature. ....                                                                                                                                                                                                                                                           | 11 |
| <b>Table S5.</b> PI-RAFT polymerisation of nBA with PMMA <sub>154k</sub> - <b>TTC-bCP</b> at ambient temperature. ....                                                                                                                                                                                                                                    | 11 |

## Methods

**Differential Scanning Calorimetry (DSC).** The glass transition temperature ( $T_g$ ) of triblock copolymer was measured by DSC using Mettler Toledo STARe DSC in nitrogen atmosphere using aluminum crucibles of 40  $\mu\text{L}$  at heating rates of 10  $^\circ\text{C}/\text{min}$ . Sample in 15 mg portion was used for analysis.  $T_g$  value was obtained from the second ramp to remove the thermal history of the sample.

**Light intensity measurement.** The light intensity of photoreactors was measured was measured with a GENTEC Maestro power and energy meter equipped with a 12 mm diameter probe. The detector was inserted inside the reactor in 3 different positions, and the light intensity was measured 3 times for 1 minute in each position.

**Nuclear Magnetic Resonance (NMR).**  $^1\text{H}$  NMR spectra of *PnBA*, PMMA, and ABA triblock copolymers were recorded at 25  $^\circ\text{C}$  with a Bruker Avance 300 MHz instrument at an operating frequency of 300.13 MHz. The resonance multiplicities are described as s (singlet), d (doublet), t (triplet), q (quartet), or m (multiplet). Chemical shifts  $\delta$  are reported in parts per million (ppm) and are referenced to the residual solvent peak ( $\text{CDCl}_3$ : H = 7.26 ppm).

**Rheological measurements.** Isochronal temperature ramp tests were performed on an Anton Paar MCR 302. The experiments were performed in parallel plate geometry using 8 mm sample disks. A frequency of 1  $\text{rad}\cdot\text{s}^{-1}$ , and a strain of 1 % were used to record the evolution of the dynamic moduli as function of the temperature with a heating rate of 2.5  $^\circ\text{C}/\text{min}$ .

**Size Exclusion Chromatography (SEC).** The molecular masses and molecular mass distributions of *PnBA*, PMMA, and ABA triblock copolymers were determined by SEC using THF as an eluent at a flow rate of 1.0  $\text{mL min}^{-1}$  at 25  $^\circ\text{C}$ . Before the analysis, the polymers were carefully dissolved in the eluent (the final concentration was 5  $\text{mg mL}^{-1}$ ) and filtered through a 0.45  $\mu\text{m}$  PTFE filter. The samples were analyzed using a two-column set Styragel HR3 and HR4 (Waters) coupled with a three-detector system: refractometer thermostated at 35  $^\circ\text{C}$  (Optilab Rex, Wyatt technology), a UV detector (Prostar, Varian) set at 290 nm, and a multiangle laser light scattering detector (Mini Dawn, 3 angles, Wyatt technology). The  $\text{dn}/\text{dc}$  for PMMA (0.085) and *PnBA* (0.067) were adopted from the literature.<sup>1,2</sup> The  $\text{dn}/\text{dc}$  of the ABA triblock copolymers were calculated based on the weight fraction of PMMA and *PnBA*.

**Thermogravimetric Analysis (TGA).** TGA analysis was conducted on a TGA/DSC 3+ Mettler with a temperature ramp of 10 °C/min under N<sub>2</sub> (50 mL/min).

### **Synthetic protocols**

**General procedure for the polymerisation of MMA with TTC-bCP.** A reaction stock solution of **TTC-bCP** and MMA (70% or 50% w/w) in acetonitrile was prepared. 1 mL of solution was then added to several glass tubes and degassed by three freeze-pump-thaw cycles. The tubes were sealed with an acetylene/oxygen flame and irradiated in a blue or green LED-based photoreactor. Polymerisation was stopped by removing the tube from the light source. The samples were directly analyzed by <sup>1</sup>H NMR. For SEC analysis, the solvent was evaporated, and polymers were dissolved in THF.

**General procedure for the polymerisation of *n*BA with TTC-bCP.** TTC-bCP was carefully dissolved in *n*-butyl acrylate. 1 mL of solution was then added to several glass tubes and degassed by three freeze-pump-thaw cycles. The tubes were sealed with an acetylene/oxygen flame and irradiated in a blue or green LED-based photoreactor. Polymerisation was stopped by removing the tube from the light source. Samples were directly analyzed by <sup>1</sup>H NMR. For SEC analysis, the residual *n*BA was evaporated, and polymers were dissolved in THF.

**General procedure for ABA triblock copolymer synthesis.** PMMA-macroCTA was carefully dissolved in *n*-butyl acrylate. 1 mL of solution was then added to several glass tubes and degassed by three freeze-pump-thaw cycles. The tubes were sealed with an acetylene/oxygen flame and irradiated in a blue LED-based photoreactor. Polymerisation was stopped by removing the tube from the light source. Samples were directly analyzed by <sup>1</sup>H NMR. For SEC analysis, the residual *n*BA was evaporated, and polymers were dissolved in THF.

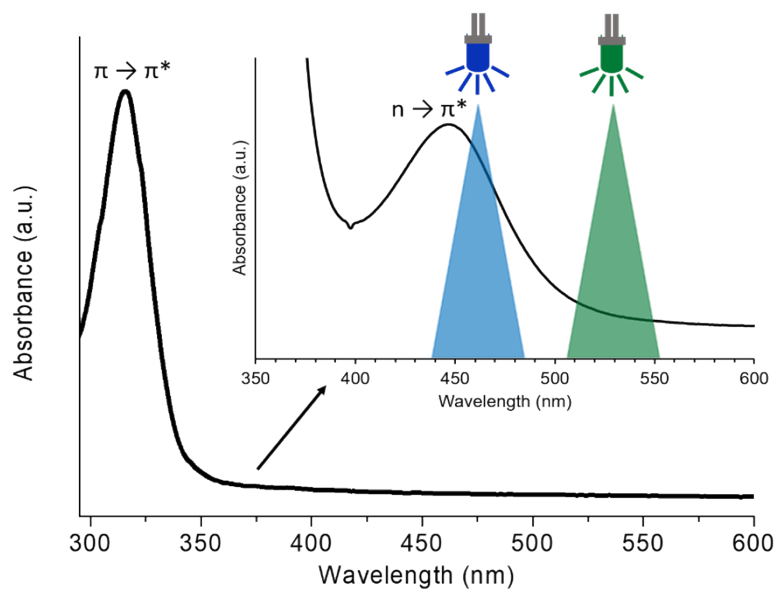

**Figure S1.** UV-Vis spectrum of bis-(2-methylpropanenitrile)trithiocarbonate (TTC-bCP).

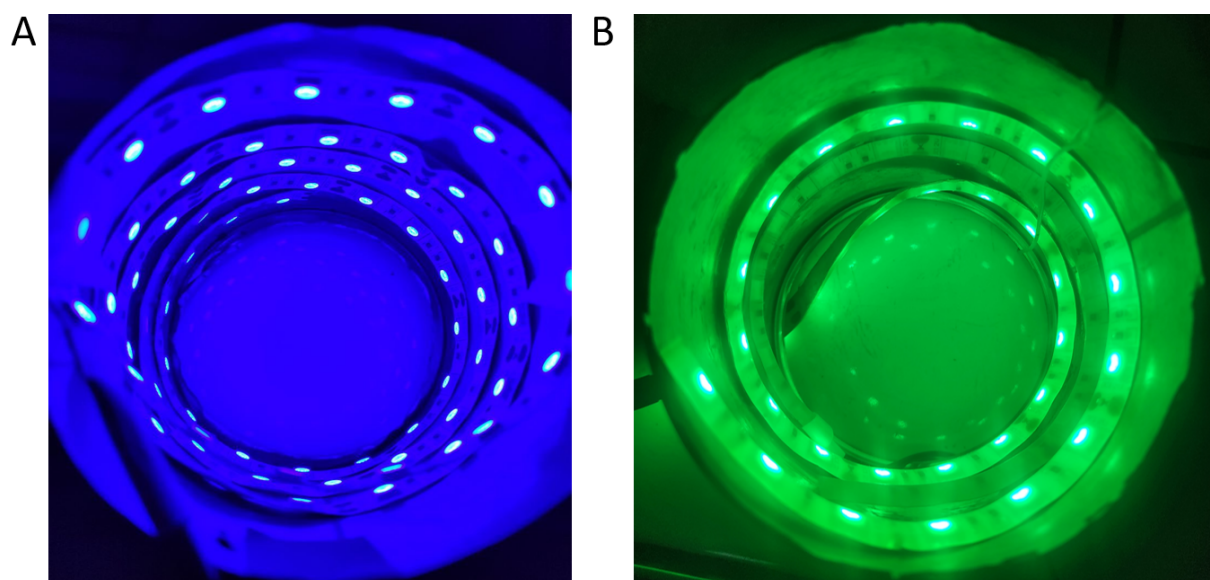

**Figure S2.** Blue (A) and green (B) LED light photoreactors (view from the top).

**Table S1.** Detailed information about the photoreactors.

| Photoreactor | Light wavelength (nm) | Number of LEDs | Light intensity (mW cm <sup>-2</sup> ) |
|--------------|-----------------------|----------------|----------------------------------------|
| Blue         | 460                   | 60             | 3.33 ± 0.43                            |
|              |                       | 30             | 2.21 ± 0.16                            |
| Green        | 530                   | 60             | 2.35 ± 0.17                            |

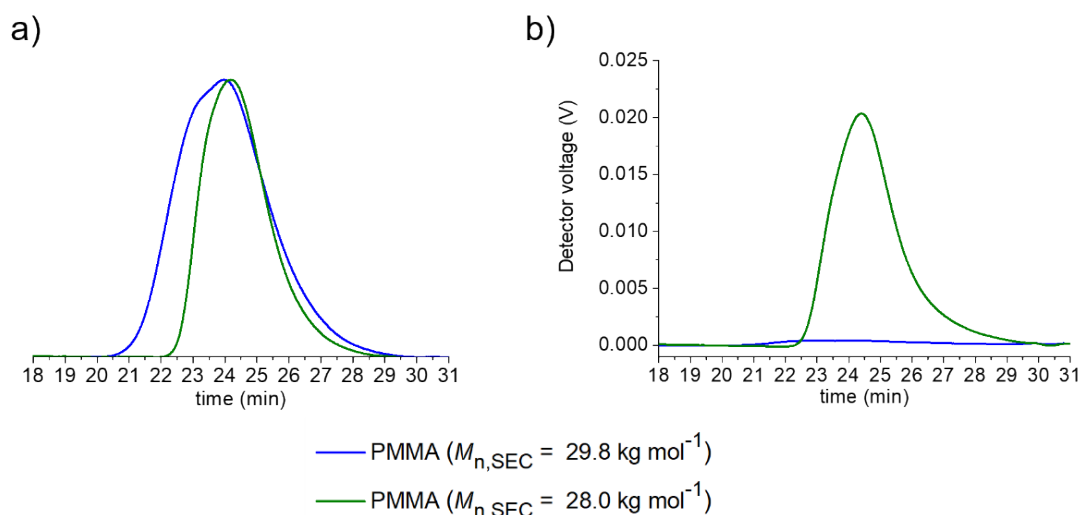

**Figure S3.** SEC chromatograms of PMMA ( $M_{n,th} = 50 \text{ kg mol}^{-1}$ ) obtained with different sources of visible light: a) normalized RI signal, b) UV detector (290 nm) voltage versus time. Blue SEC traces represent PMMA prepared under blue LED irradiation. Green SEC traces represent PMMA prepared under green LED irradiation.

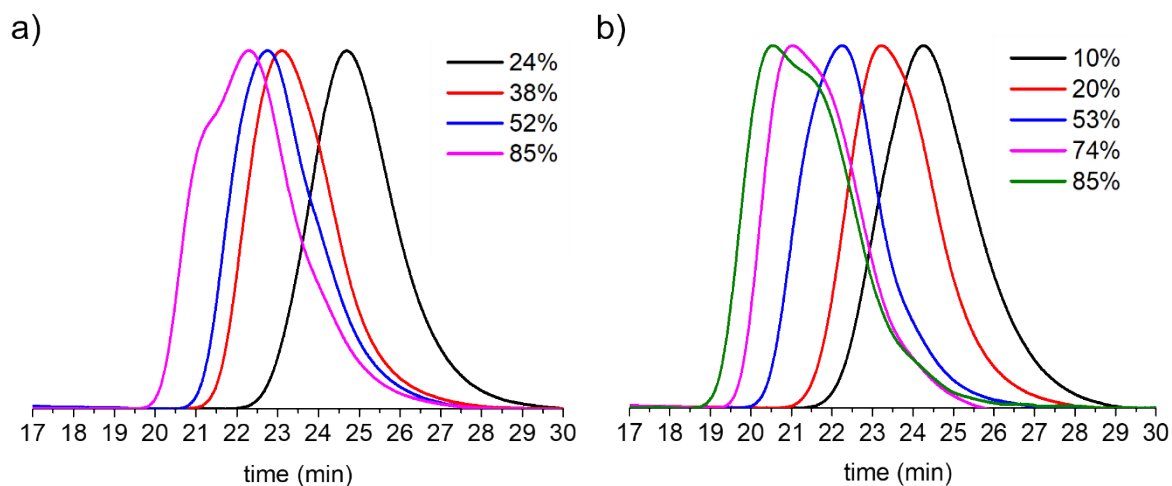

**Figure S4.** Evolution of PMMA SEC-RI chromatograms with MMA conversion for polymerisations carried out with a)  $[MMA]_0 = 4.28 \text{ mol L}^{-1}$  in acetonitrile and b)  $[MMA]_0 = 6.21 \text{ mol L}^{-1}$  in acetonitrile. Reaction conditions given in Table S2.

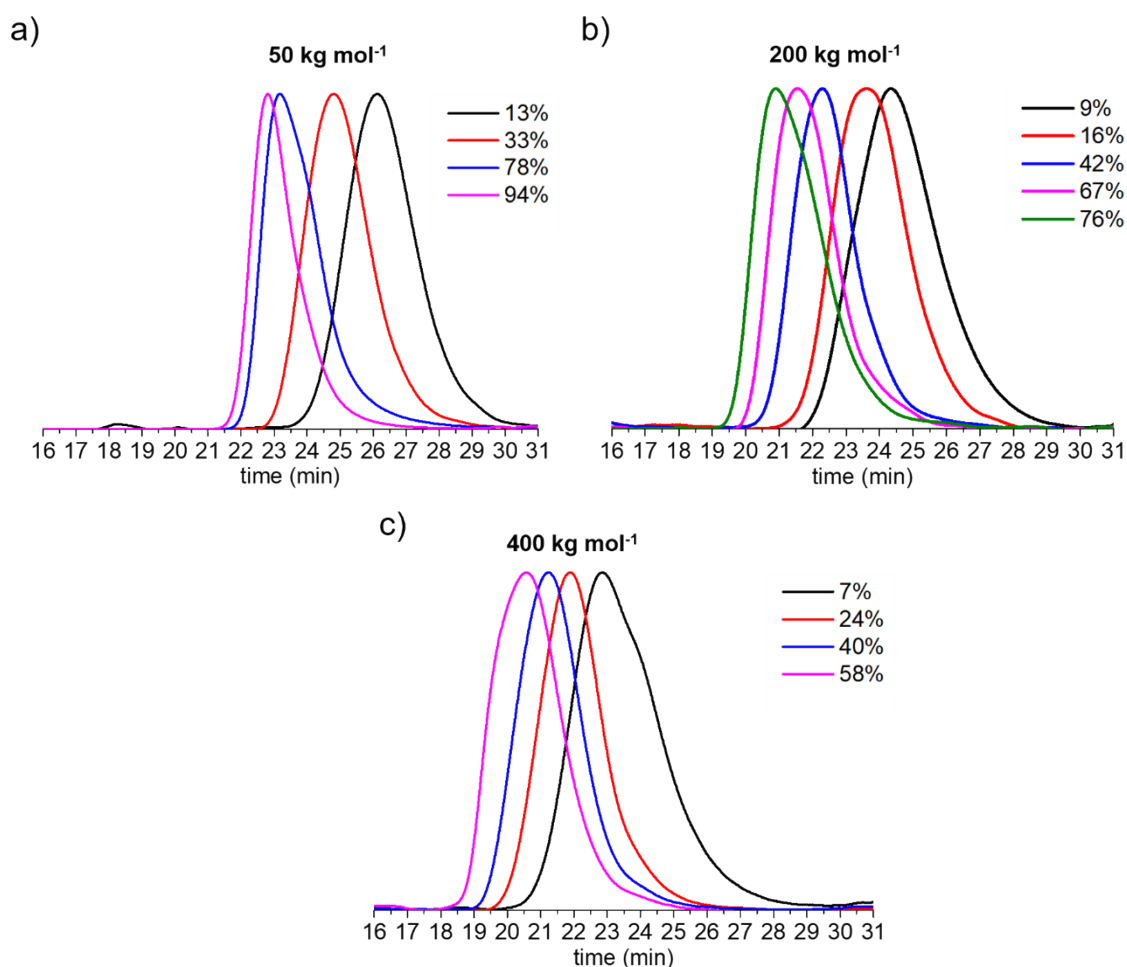

**Figure S5.** Evolution of SEC-RI chromatograms of PMMA prepared with TTC-bCP with MMA conversion for different targeted molar masses corresponding to  $[\text{TTC-bCP}]_0 = 12.49, 3.11, 1.55 \text{ mmol L}^{-1}$  respectively. Reaction conditions given in Table S3.

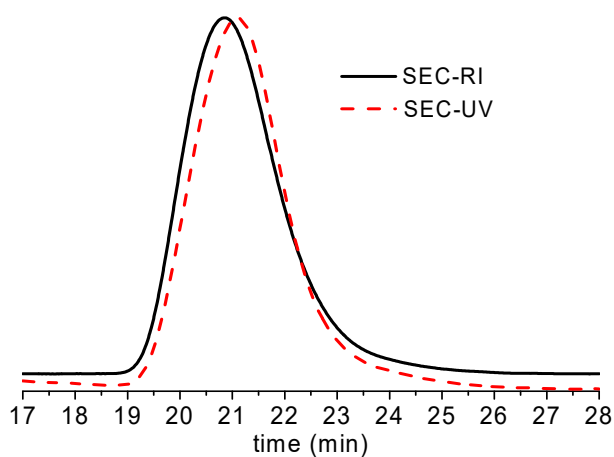

**Figure S6.** SEC chromatograms of PMMA ( $M_{n, \text{SEC}} = 192 \text{ kg mol}^{-1}$ ,  $\text{Đ} = 1.24$ ) prepared by bulk polymerisation.

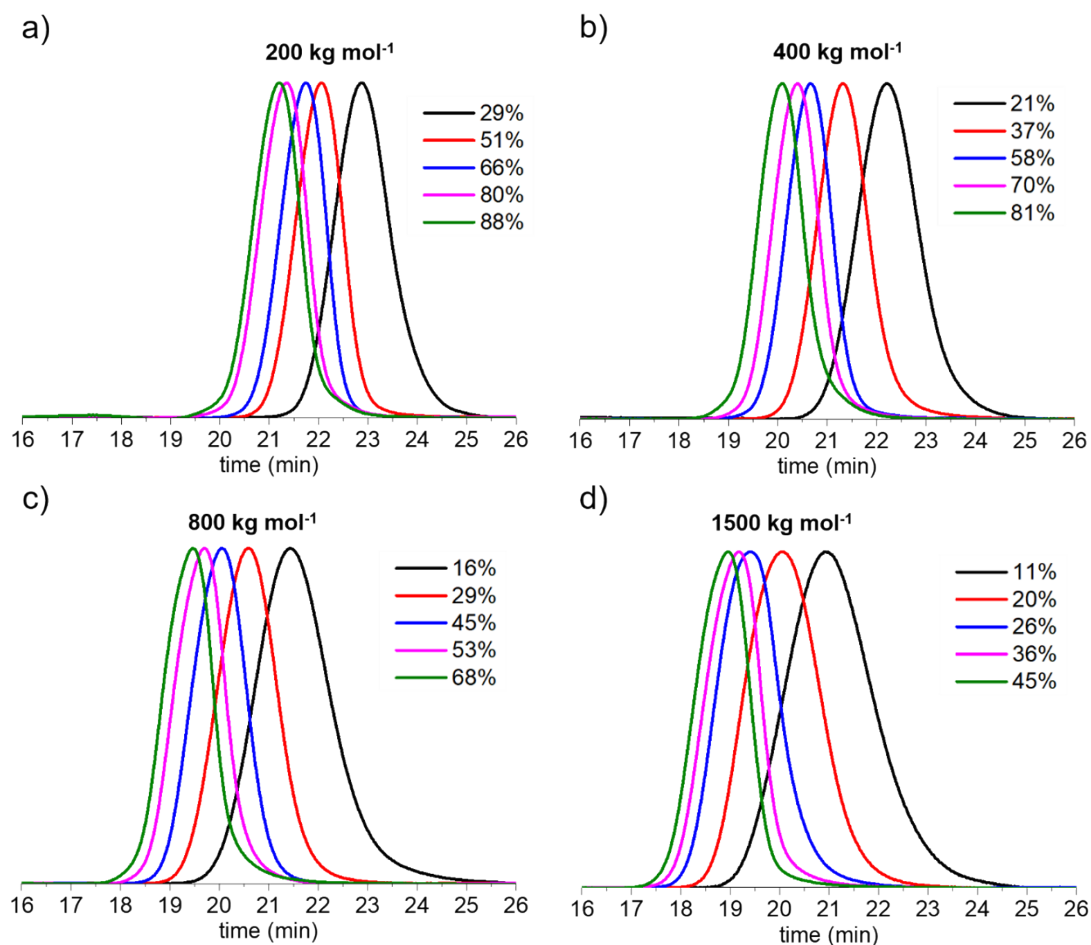

**Figure S7.** Evolution of SEC-RI chromatograms of PnBA with nBA conversion for different molar masses. Reaction conditions given in Table S4.

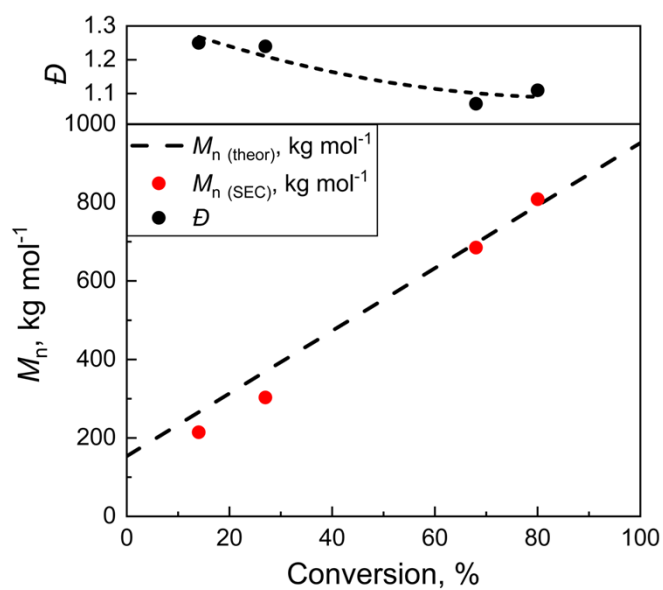

**Figure S8.** Evolution of  $M_n$  and  $\bar{D}$  during PI-RAFT polymerisation of PMMA-*b*-PnBA-*b*-PMMA from PMMA<sub>154k</sub>. Reaction conditions given in Table S5.



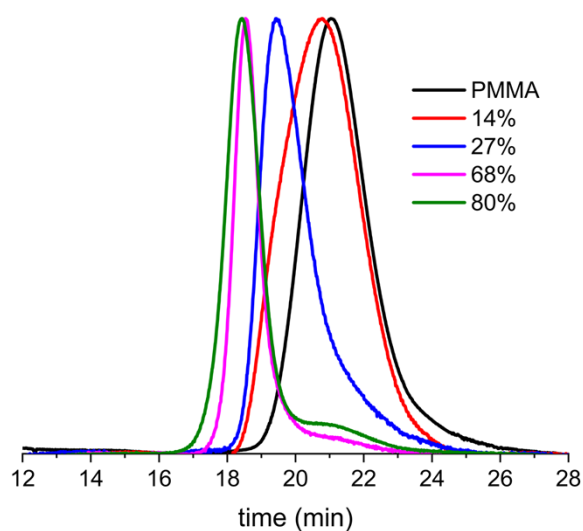

**Figure S9.** Evolution of SEC-RI chromatograms of PMMA-*b*-PnBA-*b*-PMMA synthesis from PMMA macro-CTA with *n*BA conversion for different molar masses. Reaction conditions given in Table S5.

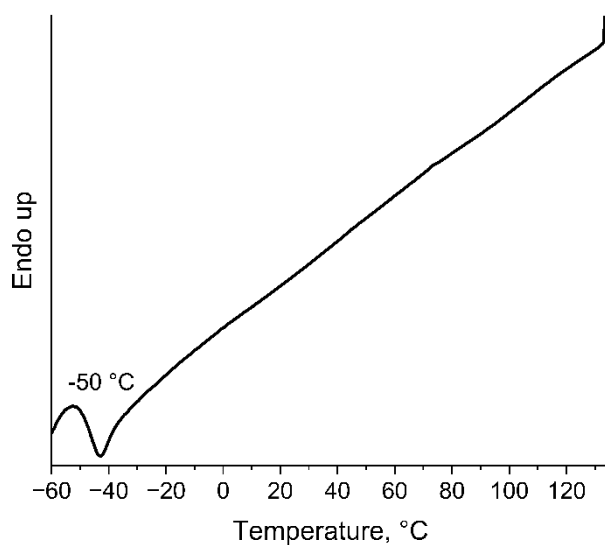

**Figure S10.** DSC thermogram of PMMA<sub>77k</sub>-*b*-PnBA<sub>531k</sub>-*b*-PMMA<sub>77k</sub>.

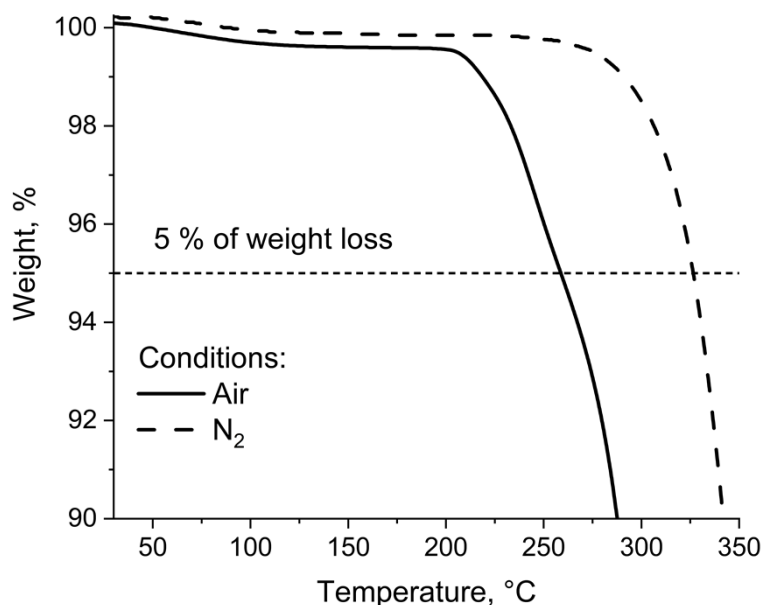

**Figure S11.** TGA of PMMA<sub>77k</sub>-*b*-PnBA<sub>531k</sub>-*b*-PMMA<sub>77k</sub> in air and N<sub>2</sub> atmosphere.

**Table S2.** PI-RAFT polymerisation of MMA with **TTC-bCP** at ambient temperature with different MMA concentrations.

| Entry | Concentration of MMA in acetonitrile | Time (h) | Conversion <sup>a</sup> (%) | $M_{n,th}^b$ (kg mol <sup>-1</sup> ) | $M_{n,SEC}^c$ (kg mol <sup>-1</sup> ) | $\bar{D}$ |
|-------|--------------------------------------|----------|-----------------------------|--------------------------------------|---------------------------------------|-----------|
| 1     | 50% w/w                              | 8        | 24                          | 49                                   | 22                                    | 1.25      |
| 2     |                                      | 16       | 38                          | 76                                   | 45                                    | 1.29      |
| 3     |                                      | 24       | 52                          | 104                                  | 567                                   | 1.28      |
| 4     |                                      | 32       | 85                          | 170                                  | 80                                    | 1.46      |
| 5     | 70% w/w                              | 4        | 10                          | 20                                   | 25                                    | 1.38      |
| 6     |                                      | 8        | 20                          | 40                                   | 42                                    | 1.31      |
| 8     |                                      | 16       | 53                          | 106                                  | 86                                    | 1.29      |
| 8     |                                      | 24       | 74                          | 148                                  | 131                                   | 1.32      |
| 9     |                                      | 32       | 85                          | 170                                  | 145                                   | 1.48      |

**Notes:** <sup>a</sup>calculated by <sup>1</sup>H NMR in CDCl<sub>3</sub>, <sup>b</sup> $M_{n,th} = [MMA]_0/[TTC-bCP]_0 \cdot M_{MMA} \cdot Conv. + M_{TTC-bCP}$ , <sup>c</sup> $M_{n,SEC}$  measured by SEC in THF with a RI-MALS detection.

**Table S3.** PI-RAFT polymerisation of MMA with **TTC-bCP** at ambient temperature with 30 LEDs.

| Entry | Targeted $M_n$ (kg mol <sup>-1</sup> ) | Time (h) | Conversion <sup>a</sup> (%) | $M_{n,th}^b$ (kg mol <sup>-1</sup> ) | $M_{n,SEC}^c$ (kg mol <sup>-1</sup> ) | $\bar{D}$ |
|-------|----------------------------------------|----------|-----------------------------|--------------------------------------|---------------------------------------|-----------|
| 1     | 50                                     | 4        | 13                          | 7                                    | 9                                     | 1.33      |
| 2     |                                        | 8        | 33                          | 17                                   | 20                                    | 1.22      |
| 3     |                                        | 16       | 78                          | 39                                   | 40                                    | 1.24      |
| 4     |                                        | 24       | 94                          | 47                                   | 46                                    | 1.27      |
| 6     | 200                                    | 4        | 9                           | 18                                   | 23                                    | 1.44      |
| 7     |                                        | 8        | 16                          | 32                                   | 38                                    | 1.28      |
| 8     |                                        | 16       | 42                          | 84                                   | 80                                    | 1.23      |
| 9     |                                        | 24       | 67                          | 134                                  | 109                                   | 1.28      |
| 10    |                                        | 32       | 76                          | 152                                  | 153                                   | 1.25      |

|    |     |    |    |     |     |      |
|----|-----|----|----|-----|-----|------|
| 11 |     | 4  | -  | -   | -   | -    |
| 12 |     | 8  | 7  | 28  | 43  | 1.40 |
| 13 | 400 | 16 | 24 | 97  | 103 | 1.29 |
| 14 |     | 24 | 40 | 160 | 145 | 1.33 |
| 15 |     | 32 | 58 | 232 | 219 | 1.35 |

**Notes:** <sup>a</sup>calculated by <sup>1</sup>H NMR in CDCl<sub>3</sub>, <sup>b</sup> $M_{n,th} = [MMA]_0/[TTC-bCP]_0 \cdot M_{MMA} \cdot Conv. + M_{TTC-bCP}$ , <sup>c</sup> $M_{n,SEC}$  measured by SEC in THF with a RI-MALS detection,  $[MMA]_0 = 6.21 \text{ mol L}^{-1}$ .

**Table S4.** PI-RAFT polymerisation of *n*BA with **TTC-bCP** at ambient temperature.

| Entry | Targeted $M_n$<br>(kg mol <sup>-1</sup> ) | Time<br>(h) | Conversion <sup>a</sup><br>(%) | $M_{n,th}$ <sup>b</sup><br>(kg mol <sup>-1</sup> ) | $M_{n,SEC}$ <sup>c</sup><br>(kg mol <sup>-1</sup> ) | $\bar{D}$ |
|-------|-------------------------------------------|-------------|--------------------------------|----------------------------------------------------|-----------------------------------------------------|-----------|
| 1     |                                           | 2           | 29                             | 58                                                 | 53                                                  | 1.05      |
| 2     |                                           | 4           | 51                             | 102                                                | 92                                                  | 1.01      |
| 3     | 200                                       | 8           | 66                             | 132                                                | 116                                                 | 1.02      |
| 4     |                                           | 16          | 80                             | 160                                                | 144                                                 | 1.02      |
| 5     |                                           | 24          | 88                             | 176                                                | 155                                                 | 1.02      |
| 6     |                                           | 2           | 21                             | 84                                                 | 74                                                  | 1.01      |
| 7     |                                           | 4           | 37                             | 148                                                | 134                                                 | 1.03      |
| 8     | 400                                       | 8           | 58                             | 232                                                | 207                                                 | 1.01      |
| 9     |                                           | 16          | 70                             | 280                                                | 247                                                 | 1.02      |
| 10    |                                           | 24          | 81                             | 324                                                | 287                                                 | 1.03      |
| 11    |                                           | 2           | 16                             | 128                                                | 110                                                 | 1.12      |
| 12    |                                           | 4           | 29                             | 232                                                | 203                                                 | 1.05      |
| 13    | 800                                       | 8           | 45                             | 360                                                | 310                                                 | 1.02      |
| 14    |                                           | 16          | 53                             | 424                                                | 413                                                 | 1.01      |
| 15    |                                           | 24          | 68                             | 544                                                | 471                                                 | 1.02      |
| 16    |                                           | 2           | 11                             | 165                                                | 159                                                 | 1.22      |
| 17    |                                           | 4           | 20                             | 300                                                | 287                                                 | 1.01      |
| 18    | 1 500                                     | 8           | 26                             | 390                                                | 417                                                 | 1.07      |
| 19    |                                           | 16          | 36                             | 540                                                | 588                                                 | 1.03      |
| 20    |                                           | 24          | 45                             | 675                                                | 718                                                 | 1.02      |

**Notes:** <sup>a</sup>calculated by <sup>1</sup>H NMR in CDCl<sub>3</sub>, <sup>b</sup> $M_{n,th} = [nBA]_0/[TTC-bCP]_0 \cdot M_{nBA} \cdot Conv. + M_{TTC-bCP}$ , <sup>c</sup> $M_{n,SEC}$  measured by SEC in THF with a RI-MALS detection,  $[nBA]_0 = 6.92 \text{ mol L}^{-1}$ .

**Table S5.** PI-RAFT polymerisation of *n*BA with PMMA<sub>154k</sub>-**TTC-bCP** at ambient temperature.

| Entry | Targeted $M_n$<br>(kg mol <sup>-1</sup> ) | Time<br>(h) | Conversion <sup>a</sup><br>(%) | $M_{n,th}$ <sup>b</sup><br>(kg mol <sup>-1</sup> ) | $M_{n,SEC}$ <sup>c</sup><br>(kg mol <sup>-1</sup> ) | $\bar{D}$ |
|-------|-------------------------------------------|-------------|--------------------------------|----------------------------------------------------|-----------------------------------------------------|-----------|
| 1     |                                           | 0           | -                              | 163                                                | 154                                                 | 1.25      |
| 2     |                                           | 2           | 14                             | 265                                                | 214                                                 | 1.25      |
| 3     | 800                                       | 5           | 27                             | 369                                                | 303                                                 | 1.24      |
| 4     |                                           | 16          | 68                             | 696                                                | 685                                                 | 1.07      |
| 5     |                                           | 24          | 80                             | 792                                                | 808                                                 | 1.11      |

**Notes:** <sup>a</sup>calculated by <sup>1</sup>H NMR in CDCl<sub>3</sub>, <sup>b</sup> $M_{n,th} = [nBA]_0/[PMMA_{154k}]_0 \cdot M_{nBA} \cdot Conv. + M_{PMMA}$ , <sup>c</sup> $M_{n,SEC}$  measured by SEC in THF with a RI-MALS detection.

1. Z. Huo, S. Arora, V. A. Kong, B. J. Myrka, A. Statt and J. E. Laaser, *Macromolecules*, 2023, **56**, 1845–1854.
2. W. Lu, A. Goodwin, Y. Wang, P. Yin, W. Wang, J. Zhu, T. Wu, X. Lu, B. Hu, K. Hong, N.-G. Kang and J. Mays, *Polym. Chem.* 2017, **9**, 160–168.
